# Supplementary material for: The Integrated Effect of Environmental Conditions and Human Presence on the Behaviour of a Pair of Zoo-Housed Asian Small-Clawed Otters
Source: MDPI journal article supplement (doi:10.3390/ani13132228), 2023-07-06
Supplement: s1 [file s1]

**Table S1.** Full results of Generalized Linear Mixed Models on the effects of environmental/individual factors and human presence on the otters' behavioral categories (N<sub>cases</sub>=168).

Note: p < 0.05 is boldface.

| Predictors                                               | Estimates | SEM   | $\chi^2$ | p                |
|----------------------------------------------------------|-----------|-------|----------|------------------|
| <b>GLMM<sub>2</sub> (vigilance)</b>                      |           |       |          |                  |
| Intercept <sup>a</sup>                                   | -7.981    | 3.191 | a        | a                |
| Animal identity1 <sup>b</sup>                            | 0.083     | 0.149 | 0.555    | 0.579            |
| Session 2 <sup>b</sup>                                   | -1.698    | 0.349 | -4.867   | <b>&lt;0.001</b> |
| Session 3 <sup>b</sup>                                   | -2.479    | 0.391 | -6.333   | <b>&lt;0.001</b> |
| Session 4 <sup>b</sup>                                   | -1.719    | 0.375 | -4.578   | <b>&lt;0.001</b> |
| Session 5 <sup>b</sup>                                   | -1.603    | 0.356 | -4.498   | <b>&lt;0.001</b> |
| Session 6 <sup>b</sup>                                   | -1.683    | 0.312 | -5.393   | <b>&lt;0.001</b> |
| Staff presence                                           | 0.234     | 0.343 | 0.681    | 0.496            |
| THI                                                      | 0.056     | 0.029 | 1.965    | <b>0.050</b>     |
| Noise                                                    | 0.049     | 0.046 | 1.071    | 0.284            |
| Visitor score                                            | 0.730     | 1.061 | 0.688    | 0.492            |
| Noise * Visitor score                                    | -0.009    | 0.017 | -0.565   | 0.572            |
| <b>GLMM<sub>4</sub> (out of sight<sub>indoor</sub>)</b>  |           |       |          |                  |
| Intercept <sup>a</sup>                                   | -0.361    | 4.427 | a        | a                |
| Animal identity1 <sup>b</sup>                            | -0.178    | 0.196 | -0.909   | 0.364            |
| Session 2 <sup>b</sup>                                   | 1.033     | 0.462 | 2.237    | <b>0.025</b>     |
| Session 3 <sup>b</sup>                                   | 2.139     | 0.501 | 4.273    | <b>&lt;0.001</b> |
| Session 4 <sup>b</sup>                                   | 0.453     | 0.484 | 0.935    | 0.350            |
| Session 5 <sup>b</sup>                                   | 0.846     | 0.464 | 1.824    | 0.068            |
| Session 6 <sup>b</sup>                                   | 1.018     | 0.409 | 2.491    | <b>0.013</b>     |
| Staff presence                                           | -0.115    | 0.487 | -0.236   | 0.814            |
| THI                                                      | -0.052    | 0.039 | -1.340   | 0.180            |
| Noise                                                    | 0.057     | 0.069 | 0.829    | 0.407            |
| Visitor score                                            | 0.792     | 1.791 | 0.442    | 0.658            |
| Noise * Visitor score                                    | -0.016    | 0.028 | -0.596   | 0.551            |
| <b>GLMM<sub>5</sub> (out of sight<sub>outdoor</sub>)</b> |           |       |          |                  |
| Intercept <sup>a</sup>                                   | -5.118    | 3.250 | a        | a                |
| Animal identity1 <sup>b</sup>                            | 0.394     | 0.126 | 3.116    | <b>0.002</b>     |
| Session 2 <sup>b</sup>                                   | -0.588    | 0.313 | -1.881   | 0.060            |
| Session 3 <sup>b</sup>                                   | -1.698    | 0.370 | -4.590   | <b>&lt;0.001</b> |
| Session 4 <sup>b</sup>                                   | -0.031    | 0.347 | -0.090   | 0.928            |

|                                                              |        |       |        |                  |
|--------------------------------------------------------------|--------|-------|--------|------------------|
| Session 5 <sup>b</sup>                                       | -0.460 | 0.329 | -1.397 | 0.162            |
| Session 6 <sup>b</sup>                                       | -0.819 | 0.280 | -2.922 | <b>0.003</b>     |
| Staff presence                                               | 0.459  | 0.285 | 1.608  | 0.108            |
| THI                                                          | 0.049  | 0.031 | 1.565  | 0.118            |
| Noise                                                        | -0.014 | 0.045 | -0.322 | 0.747            |
| Visitor score                                                | -0.781 | 1.035 | -0.755 | 0.450            |
| Noise * Visitor score                                        | 0.015  | 0.016 | 0.907  | 0.365            |
| <b>GLMM<sub>6</sub> (<i>locomotion</i>)</b>                  |        |       |        |                  |
| Intercept <sup>a</sup>                                       | -4.771 | 5.637 | a      | a                |
| Animal identity1 <sup>b</sup>                                | 0.075  | 0.113 | 0.664  | 0.507            |
| Session 2 <sup>b</sup>                                       | -0.567 | 0.289 | -1.964 | <b>0.005</b>     |
| Session 3 <sup>b</sup>                                       | -1.325 | 0.363 | -3.650 | <b>&lt;0.001</b> |
| Session 4 <sup>b</sup>                                       | -0.278 | 0.404 | -0.687 | 0.492            |
| Session 5 <sup>b</sup>                                       | -0.306 | 0.316 | -0.967 | 0.333            |
| Session 6 <sup>b</sup>                                       | -0.475 | 0.290 | -1.635 | 0.102            |
| Staff presence                                               | 0.576  | 0.344 | 1.674  | 0.094            |
| THI                                                          | 0.031  | 0.026 | 1.203  | 0.229            |
| Noise                                                        | -0.012 | 0.091 | -0.129 | 0.898            |
| Visitor score                                                | -0.050 | 2.262 | -0.022 | 0.982            |
| Noise * Visitor score                                        | 0.002  | 0.035 | 0.061  | 0.952            |
| <b>GLMM<sub>9</sub> (<i>caregiver-otter interaction</i>)</b> |        |       |        |                  |
| Intercept <sup>a</sup>                                       | -5.785 | 2.581 | a      | a                |
| Animal identity1 <sup>b</sup>                                | 0.077  | 0.115 | 0.672  | 0.502            |
| Session 2 <sup>b</sup>                                       | -0.791 | 0.253 | -3.129 | <b>0.002</b>     |
| Session 3 <sup>b</sup>                                       | -0.432 | 0.278 | -1.555 | 0.120            |
| Session 4 <sup>b</sup>                                       | -0.136 | 0.280 | -0.486 | 0.627            |
| Session 5 <sup>b</sup>                                       | -0.381 | 0.250 | -1.521 | 0.128            |
| Session 6 <sup>b</sup>                                       | -0.461 | 0.216 | -2.134 | <b>0.033</b>     |
| Staff presence                                               | 1.467  | 0.249 | 5.880  | <b>&lt;0.001</b> |
| THI                                                          | 0.009  | 0.023 | 0.396  | 0.692            |
| Noise                                                        | 0.001  | 0.036 | 0.037  | 0.971            |
| Visitor score                                                | 0.307  | 0.840 | 0.362  | 0.717            |
| Noise * Visitor score                                        | -0.004 | 0.013 | -0.275 | 0.783            |
| <b>GLMM<sub>10</sub> (<i>visitor-otter interaction</i>)</b>  |        |       |        |                  |
| Intercept <sup>a</sup>                                       | -5.486 | 3.063 | a      | a                |
| Animal identity1 <sup>b</sup>                                | -0.240 | 0.106 | -2.249 | <b>0.002</b>     |
| Session 2 <sup>b</sup>                                       | -0.191 | 0.269 | -0.710 | 0.478            |

|                                            |        |       |        |                  |
|--------------------------------------------|--------|-------|--------|------------------|
| Session 3 <sup>b</sup>                     | -0.473 | 0.305 | -1.549 | 0.121            |
| Session 4 <sup>b</sup>                     | 0.027  | 0.299 | 0.091  | 0.927            |
| Session 5 <sup>b</sup>                     | 0.262  | 0.272 | 0.960  | 0.337            |
| Session 6 <sup>b</sup>                     | 0.088  | 0.243 | 0.360  | 0.719            |
| Staff presence                             | 0.122  | 0.292 | 0.419  | 0.675            |
| THI                                        | 0.027  | 0.031 | 0.865  | 0.387            |
| Noise                                      | -0.028 | 0.052 | -0.547 | 0.585            |
| Visitor score                              | -0.966 | 1.643 | -0.588 | 0.557            |
| Noise * Visitor score                      | 0.018  | 0.025 | 0.729  | 0.466            |
| <b>GLMM<sub>11</sub> (<i>juggling</i>)</b> |        |       |        |                  |
| Intercept <sup>a</sup>                     | -5.341 | 3.214 | a      | a                |
| Animal identity1 <sup>b</sup>              | 0.801  | 0.149 | 3.569  | <b>&lt;0.001</b> |
| Session 2 <sup>b</sup>                     | -0.409 | 0.336 | -1.218 | 0.223            |
| Session 3 <sup>b</sup>                     | -0.621 | 0.350 | -1.776 | 0.076            |
| Session 4 <sup>b</sup>                     | 0.074  | 0.341 | 0.218  | 0.828            |
| Session 5 <sup>b</sup>                     | -0.108 | 0.331 | -0.327 | 0.743            |
| Session 6 <sup>b</sup>                     | -0.445 | 0.295 | -1.507 | 0.132            |
| Staff presence                             | -0.109 | 0.327 | -0.333 | 0.739            |
| THI                                        | 0.041  | 0.028 | 1.464  | 0.143            |
| Noise                                      | -0.025 | 0.045 | -0.566 | 0.571            |
| Visitor score                              | -0.420 | 1.059 | -0.397 | 0.691            |
| Noise * Visitor score                      | 0.009  | 0.016 | 0.540  | 0.589            |
| <b>GLMM<sub>12</sub> (<i>ARBs</i>)</b>     |        |       |        |                  |
| Intercept <sup>a</sup>                     | -5.146 | 3.191 | a      | a                |
| Animal identity1 <sup>b</sup>              | -0.030 | 0.139 | -0.212 | 0.832            |
| Session 2 <sup>b</sup>                     | 0.549  | 0.313 | 1.752  | 0.080            |
| Session 3 <sup>b</sup>                     | 0.005  | 0.350 | 0.014  | 0.990            |
| Session 4 <sup>b</sup>                     | -0.098 | 0.356 | -0.274 | 0.784            |
| Session 5 <sup>b</sup>                     | -0.128 | 0.335 | -0.384 | 0.701            |
| Session 6 <sup>b</sup>                     | -0.121 | 0.290 | -0.416 | 0.677            |
| Staff presence                             | 0.888  | 0.294 | 3.025  | <b>0.002</b>     |
| THI                                        | 0.017  | 0.028 | 0.614  | 0.539            |
| Noise                                      | -0.010 | 0.045 | -0.230 | 0.818            |
| Visitor score                              | -0.010 | 1.076 | -0.009 | 0.993            |
| Noise * Visitor score                      | 0.001  | 0.016 | 0.050  | 0.960            |

<sup>a</sup>Not shown as not having a meaningful interpretation.

<sup>b</sup>These predictors were dummy-coded, with the reference category as follow: Animal identity = 0; Session = Session 1.
